# Supplementary material
Source: publisher figshare collection journal article supplement (https://acs.figshare.com/ndownloader/files/4161229)
Supplement: Supplementary file 1 [file 4161229]

# Supplementary Figure S1

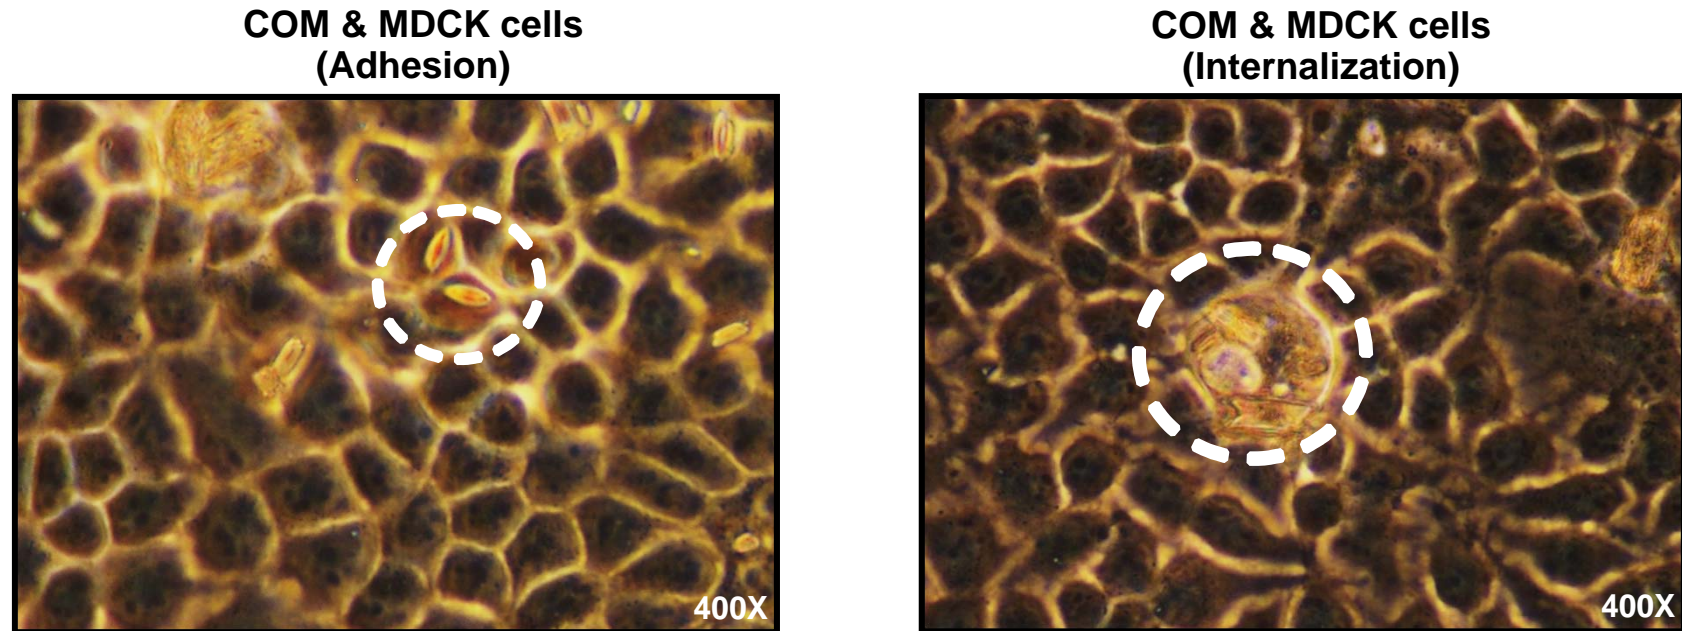

**Figure S1:** Interaction of CaOx crystals with renal tubular (MDCK) cells. COM crystals adhered on surface of MDCK cells (Left) and were internalized into the cells (Right) after 48-h incubation with MDCK cells (100  $\mu$ g crystals per mL of culture medium) followed by vigorous washes with PBS three times to remove the non-adherent crystals. Images were captured by a phase-contrast microscope. Original magnification power was 400X.
